# Supplementary material for: MoC@NC cocatalyst-modified ZnIn2S4 with strong 2D/2D hetero-interface interaction for efficient H2 evolution
Source: Royal Society of Chemistry journal article supplement (doi:10.1039/d3ce00907f), 2023-01-01
Supplement: d3ce00907f1.pdf [file d3ce00907f1.pdf]

## **MoC@NC as a cocatalyst modified ZnIn<sub>2</sub>S<sub>4</sub> with strong 2D/2D hetero-interface interaction for efficient H<sub>2</sub> evolution**

Lu Chen<sup>a\*</sup>, Deling Wang<sup>a</sup>, Renkun Huang<sup>a\*</sup>, Ruowen, Liang<sup>a</sup>, Linzhu Zhang<sup>a</sup>, Shaoming Ying<sup>a\*</sup>,  
Guiyang Yan<sup>a</sup>

<sup>a</sup>Department of Chemistry, Fujian Province University Key Laboratory of Green Energy and  
Environment Catalysis, Ningde Normal University, Ningde 352100, PR China

Table S1 The light intensity of the Xenon lamp at different wavelengths.

| Wavelength(nm)                        | 420     | 450     | 500     | 550     | 600     |
|---------------------------------------|---------|---------|---------|---------|---------|
| Light intensity(mW·cm <sup>-2</sup> ) | 12.3804 | 12.0411 | 20.0861 | 23.6001 | 21.6074 |

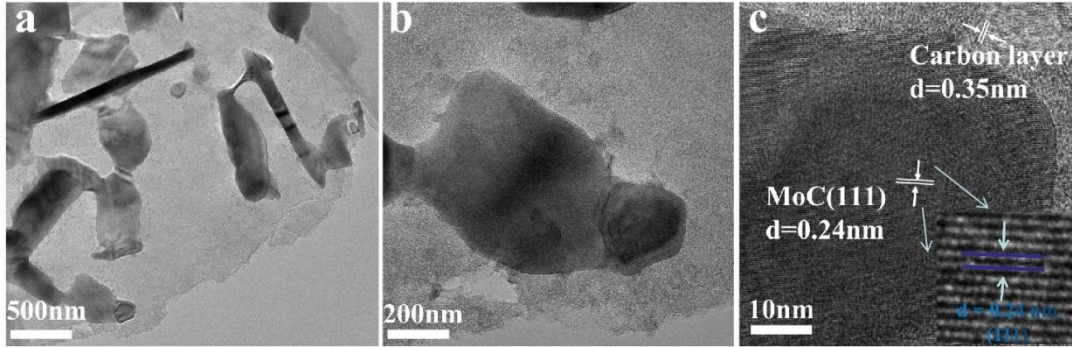

Figure S1 TEM and HRTEM images of MoC@NC.

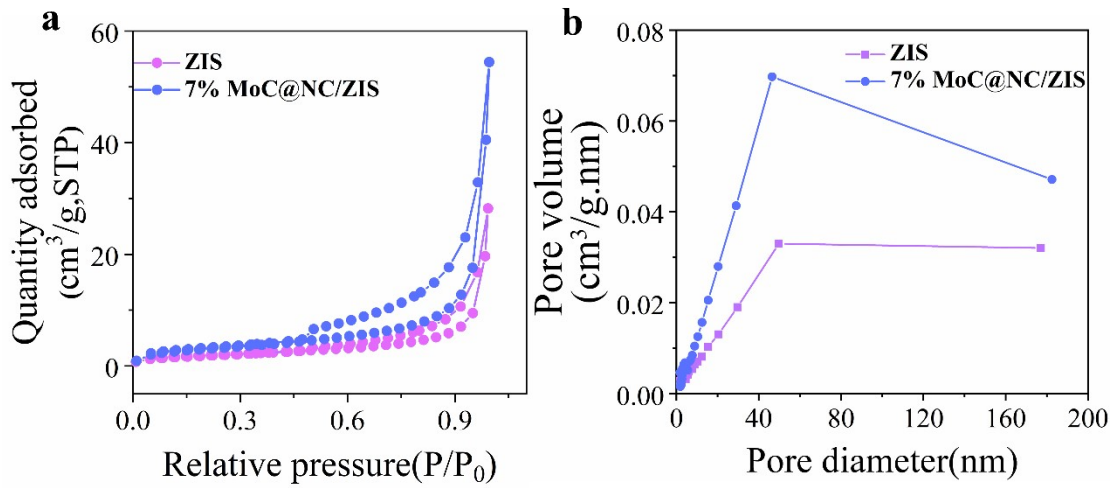

Figure S2 The ZIS and MoC@NC (7 wt %)/ZIS samples: (a) Nitrogen adsorption-desorption isotherms and (b) pore size distribution

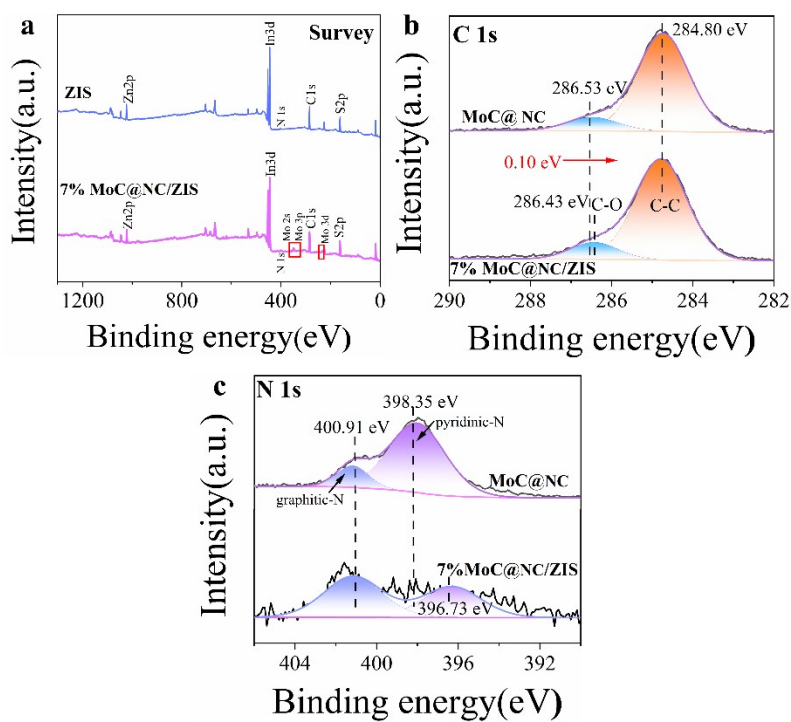

Figure S3 XPS spectra of ZIS, MoC@NC and 7 wt% MoC@NC/ZIS: (a) survey spectra; (b) C 1s; (c) N 1s.

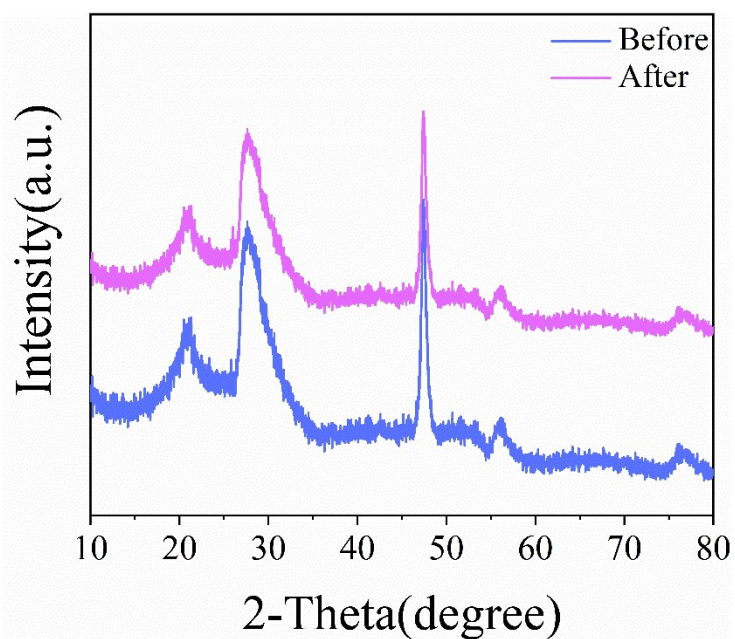

Figure S4 XRD patterns of 7 wt% MoC@NC/ZIS after six cycles of photocatalysis.

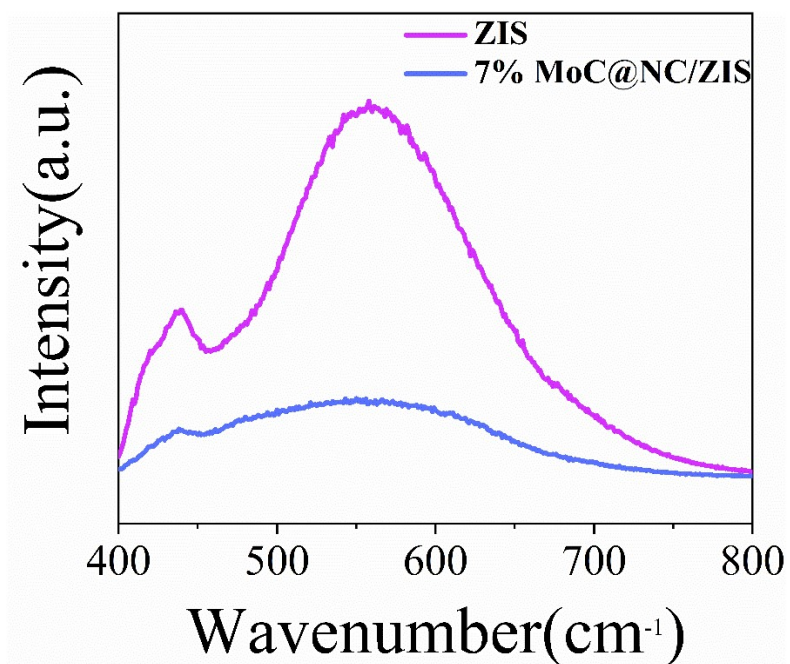

Figure S5 PL spectra of ZIS and 7 wt %MoC@NC/ZIS.

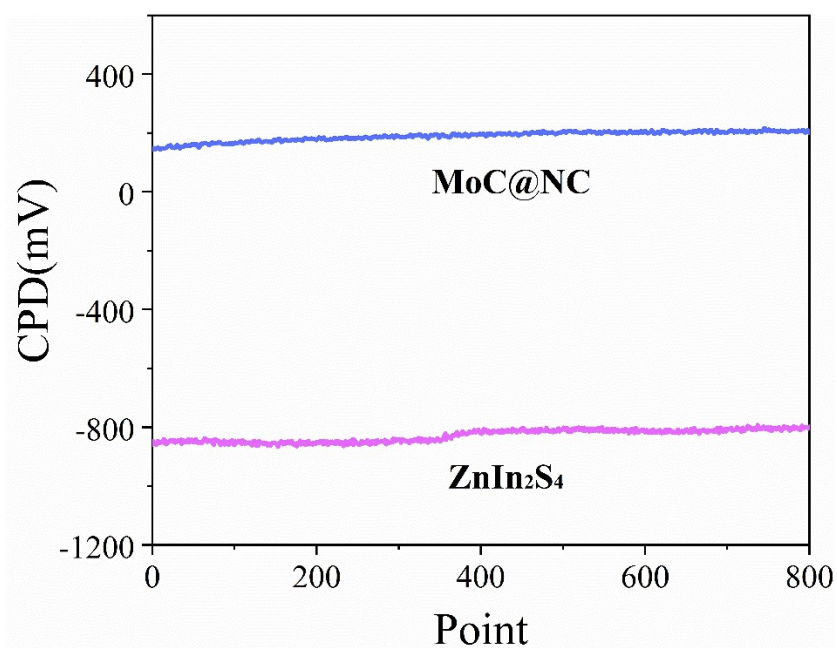

Figure S6 CPDs of ZIS and MoC@NC surface related to Au reference at single-point measurement over 800 points.
